# Supplementary material for: Clinical Severity of Visceral Leishmaniasis Is Associated with Changes in Immunoglobulin G Fc N-Glycosylation
Source: PubMed Central journal article supplement — mBio. 2014 Dec 2;5(6):e01844-14. doi: 10.1128/mBio.01844-14 (PMC4324239; doi:10.1128/mbio.01844-14), 2014-12-02
Supplement: mbo006142078st2.pdf [file mbo006142078st2.pdf]

Table S2. Descriptives of Fc N-glycosylation features and serum mediators among distinct clinical-epidemiological populations

|                                  | VL median (IQR) | ASYMP median (IQR) | EC median (IQR) | NC median (IQR) |
|----------------------------------|-----------------|--------------------|-----------------|-----------------|
| <b>IgG1 glyco features</b>       |                 |                    |                 |                 |
| Gal                              | 23.3 (18.0)     | 42.0 (12.7)***     | 43.5 (13.1)***  | 48.3 (8.94)***  |
| Sial                             | 1.7 (2.4)       | 3.9 (2.7)***       | 4.2 (2.5)***    | 4.8 (2.6)***    |
| Sial/Gal                         | 3.5 (2.6)       | 4.8 (2.2)***       | 4.7 (2.1)***    | 5.2 (2.1)***    |
| BisGlcNAc                        | 3.6 (3.6)       | 6.7 (3.3)***       | 7.0 (3.0)***    | 6.3 (3.1)***    |
| Core Fuc                         | 99.7 (0.9)      | 97.9 (2.8)***      | 98.2 (2.7)***   | 97.6 (2.7)***   |
| <b>IgG2&amp;3 glyco features</b> |                 |                    |                 |                 |
| Gal                              | 15.9 (12.1)     | 32.6 (12.3)***     | 34.4 (13.6)***  | 39.0 (6.7)***   |
| Sial                             | 1.3 (2.9)       | 4.0 (3.2)***       | 4.2 (2.7)***    | 5.0 (2.4)***    |
| Sial/Gal                         | 4.4 (6.5)       | 6.3 (3.1)***       | 5.9 (2.3)***    | 6.7 (2.3)***    |
| BisGlcNAc                        | 3.5 (4.3)       | 5.6 (2.7)***       | 5.6 (2.4)***    | 5.2 (2.1)*      |
| <b>Serum mediators</b>           |                 |                    |                 |                 |
| IL-1 $\beta$                     | 1.9 (1.2)       | 1.4 (1.0)***       | 1.1 (0.8)**     | -               |
| IL-6                             | 8.4 (29.9)      | 2.3 (1.9)***       | 1.8 (1.9)***    | -               |
| TNF- $\alpha$                    | 21.9 (44.9)     | 4.4 (7.4)***       | 1.3 (2.6)***    | -               |
| IL-12p70                         | 5.4 (14.4)      | 4.3 (1.2)***       | 4.1 (1.6)**     | -               |
| IFN- $\gamma$                    | 24.2 (74.5)     | 4.0 (3.7)***       | 4.2 (4.2)***    | -               |
| IL-17                            | 4.6 (9.5)       | 2.7 (1.3)***       | 2.3 (2.3)***    | -               |
| IL-10                            | 57.6 (174.1)    | 3.7 (3.3)***       | 3.3 (2.6)***    | -               |
| IL-5                             | 1.9 (2.9)       | 1.3 (1.3)***       | 1.1 (1.2)**     | -               |
| IL-4                             | 18.1 (24.8)     | 14.4 (9.0)         | 13.8 (6.1)      | -               |
| CRP                              | 45.0 (55.5)     | 0.4 (1.2)***       | 0.1 (0.5)***    | -               |

Abbreviations: IQR, interquartile range. Gal, level of galactosylation; Sial, level of sialylation; Bis GlcNAc, level of bisecting N-acetylglucosamine; Core F, level of core fucosylation,; IL, interleukin; TNF-  $\alpha$ , tumor necrosis factor alfa; IFN- $\gamma$ , interferon gamma; CRP, C-reactive protein. Statistically significant differences between (i) nonendemic controls, endemic controls and asymptomatic individuals and (ii) patients were evaluated by Kruskal-Wallis test and are given as \* $P \leq 0.05$ , \*\* $P \leq 0.01$ , \*\*\* $P \leq 0.001$ .
